# Supplementary material
Source: MDPI journal article supplement (https://www.mdpi.com/2075-163X/11/12/1422)
Supplement: s1 [file s1]

## Supplementary material

**Table S1.** The calculation results of the calculated background values of PTEs.

|             | Cd   | Co    | Cu    | Cr     | Ni    | Pb    | Zn     | V     | As    | Mo   | Sb   | Hg   |
|-------------|------|-------|-------|--------|-------|-------|--------|-------|-------|------|------|------|
| min         | 0.06 | 0.51  | 2.09  | 14.32  | 2.06  | 10.18 | 8.26   | 24.75 | 0.20  | 0.19 | 0.55 | 0.01 |
| Q1          | 0.23 | 2.59  | 9.61  | 26.12  | 8.76  | 16.19 | 43.09  | 39.77 | 5.00  | 0.38 | 1.12 | 0.07 |
| median      | 0.33 | 4.12  | 11.83 | 31.26  | 11.75 | 19.07 | 55.00  | 46.75 | 8.13  | 0.56 | 1.51 | 0.18 |
| Q3          | 0.42 | 6.22  | 15.82 | 37.80  | 14.93 | 22.63 | 74.33  | 57.31 | 14.17 | 0.79 | 2.04 | 0.30 |
| max         | 1.54 | 14.77 | 52.96 | 102.15 | 54.90 | 56.03 | 418.83 | 96.65 | 64.63 | 3.07 | 7.62 | 3.62 |
| Local BVs * | 0.32 | 4.07  | 12.36 | 31.88  | 11.57 | 19.25 | 66.53  | 47.91 | 8.16  | 0.56 | 1.60 | 0.17 |

\* The normality test of the soil data is carried out in accordance with the GB/T 4882-2001. Cd, Co, Cu, Cr, Ni, Pb, Zn, As, Mo, and Hg are log-normally distributed ( $P > 0.05$ ) showed by K-S test, and their background values are represented by geometric mean values. V and Sb are neither normally distributed nor log-normal. Therefore, the box plot was used to judge and eliminate the outliers outside ( $Q1 - 1.5IQR \sim Q3 + 1.5IQR$ ) one by one. After eliminating outliers, V and Sb data sets are log-normally distributed, then the corrected geometric mean is regarded as the CBVs.

**Table S2.** The pH values, particle size compositions, total organic carbon (TOC) in soils in Caidi River Watershed.

| Parameter                          | Max   | Min   | Average | SD    | CV   |
|------------------------------------|-------|-------|---------|-------|------|
| pH                                 | 8.04  | 4.56  | 6.37    | 0.66  | 0.10 |
| Clay (% , $< 2\mu\text{m}$ )       | 29.34 | 2.54  | 8.01    | 4.34  | 0.54 |
| Silt (% , $2 \sim 50\mu\text{m}$ ) | 73.91 | 16.93 | 47.64   | 14.51 | 0.30 |
| Sand (% , $> 50\mu\text{m}$ )      | 80.45 | 12.14 | 44.35   | 18.05 | 0.41 |
| TOC (g/kg)                         | 82.83 | 9.79  | 36.42   | 13.55 | 0.37 |

**Table S3.** The intensities of metal loss of different land use types in Caidi River Watershed.

| Land use type                           | Cd       | Pb       | Sb       | Hg       | As       | Zn       | TOC       |
|-----------------------------------------|----------|----------|----------|----------|----------|----------|-----------|
|                                         | g/(ha.a) | g/(ha.a) | g/(ha.a) | g/(ha.a) | g/(ha.a) | g/(ha.a) | kg/(ha.a) |
| Paddy field                             | 0.002    | 0.117    | 0.019    | 0.002    | 0.060    | 0.341    | 0.216     |
| Dry arable land (slope $\leq 6^\circ$ ) | 0.094    | 5.353    | 1.021    | 0.061    | 2.864    | 14.635   | 10.553    |
| Dry arable land (slope $> 6^\circ$ )    | 0.196    | 10.608   | 1.439    | 0.098    | 5.325    | 29.547   | 20.095    |
| Forest land                             | 0.006    | 0.312    | 0.043    | 0.004    | 0.162    | 0.860    | 0.588     |
| Grassland                               | 0.019    | 1.031    | 0.166    | 0.017    | 0.569    | 2.858    | 1.928     |
